# Supplementary material for: DRD4 48 bp multiallelic variants as age-population-specific biomarkers in attention-deficit/hyperactivity disorder
Source: PubMed Central journal article supplement (PMC7031506; doi:10.1038/s41398-020-0755-4), 2020-02-19

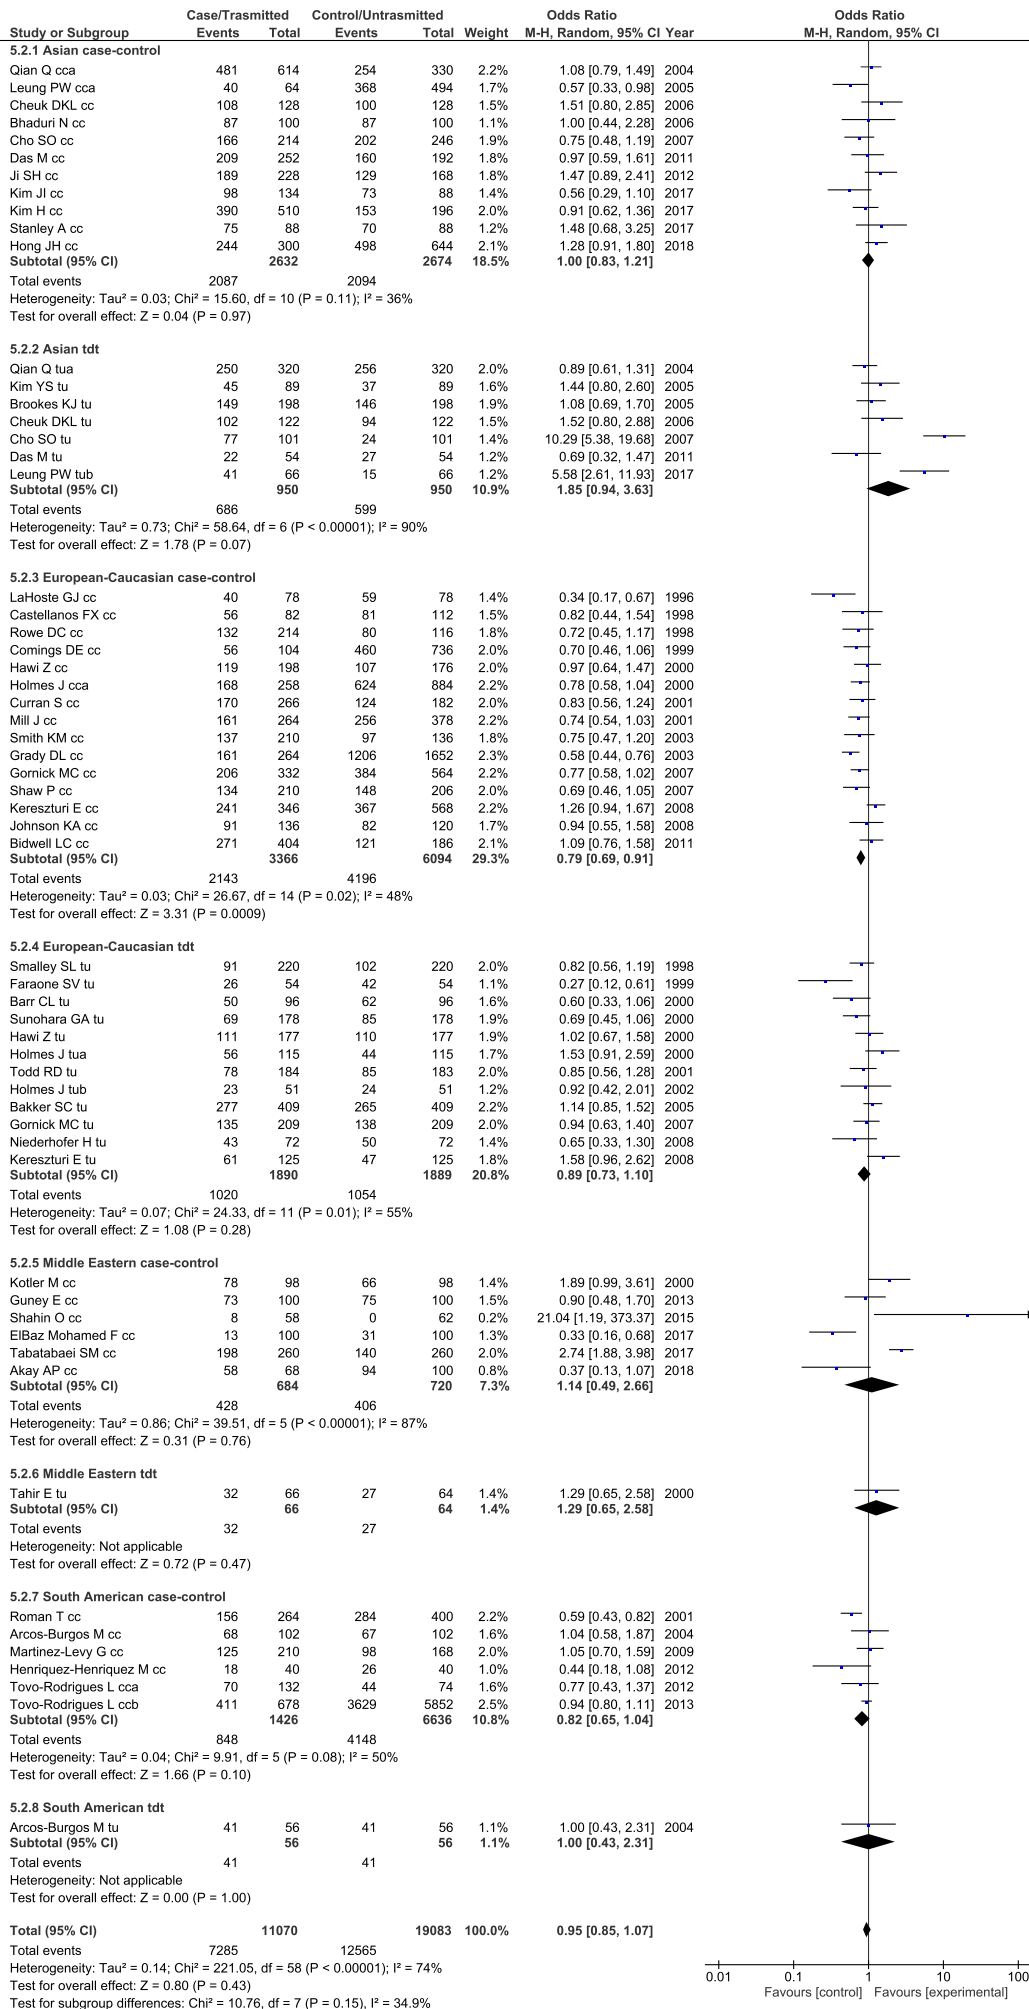

Supplement: 41398_2020_755_MOESM3_ESM.pdf [file 41398_2020_755_MOESM3_ESM.pdf]
