# Supplementary material for: DRD4 48 bp multiallelic variants as age-population-specific biomarkers in attention-deficit/hyperactivity disorder
Source: PubMed Central journal article supplement (PMC7031506; doi:10.1038/s41398-020-0755-4), 2020-02-19
Supplement: 41398_2020_755_MOESM5_ESM.pdf [file 41398_2020_755_MOESM5_ESM.pdf]

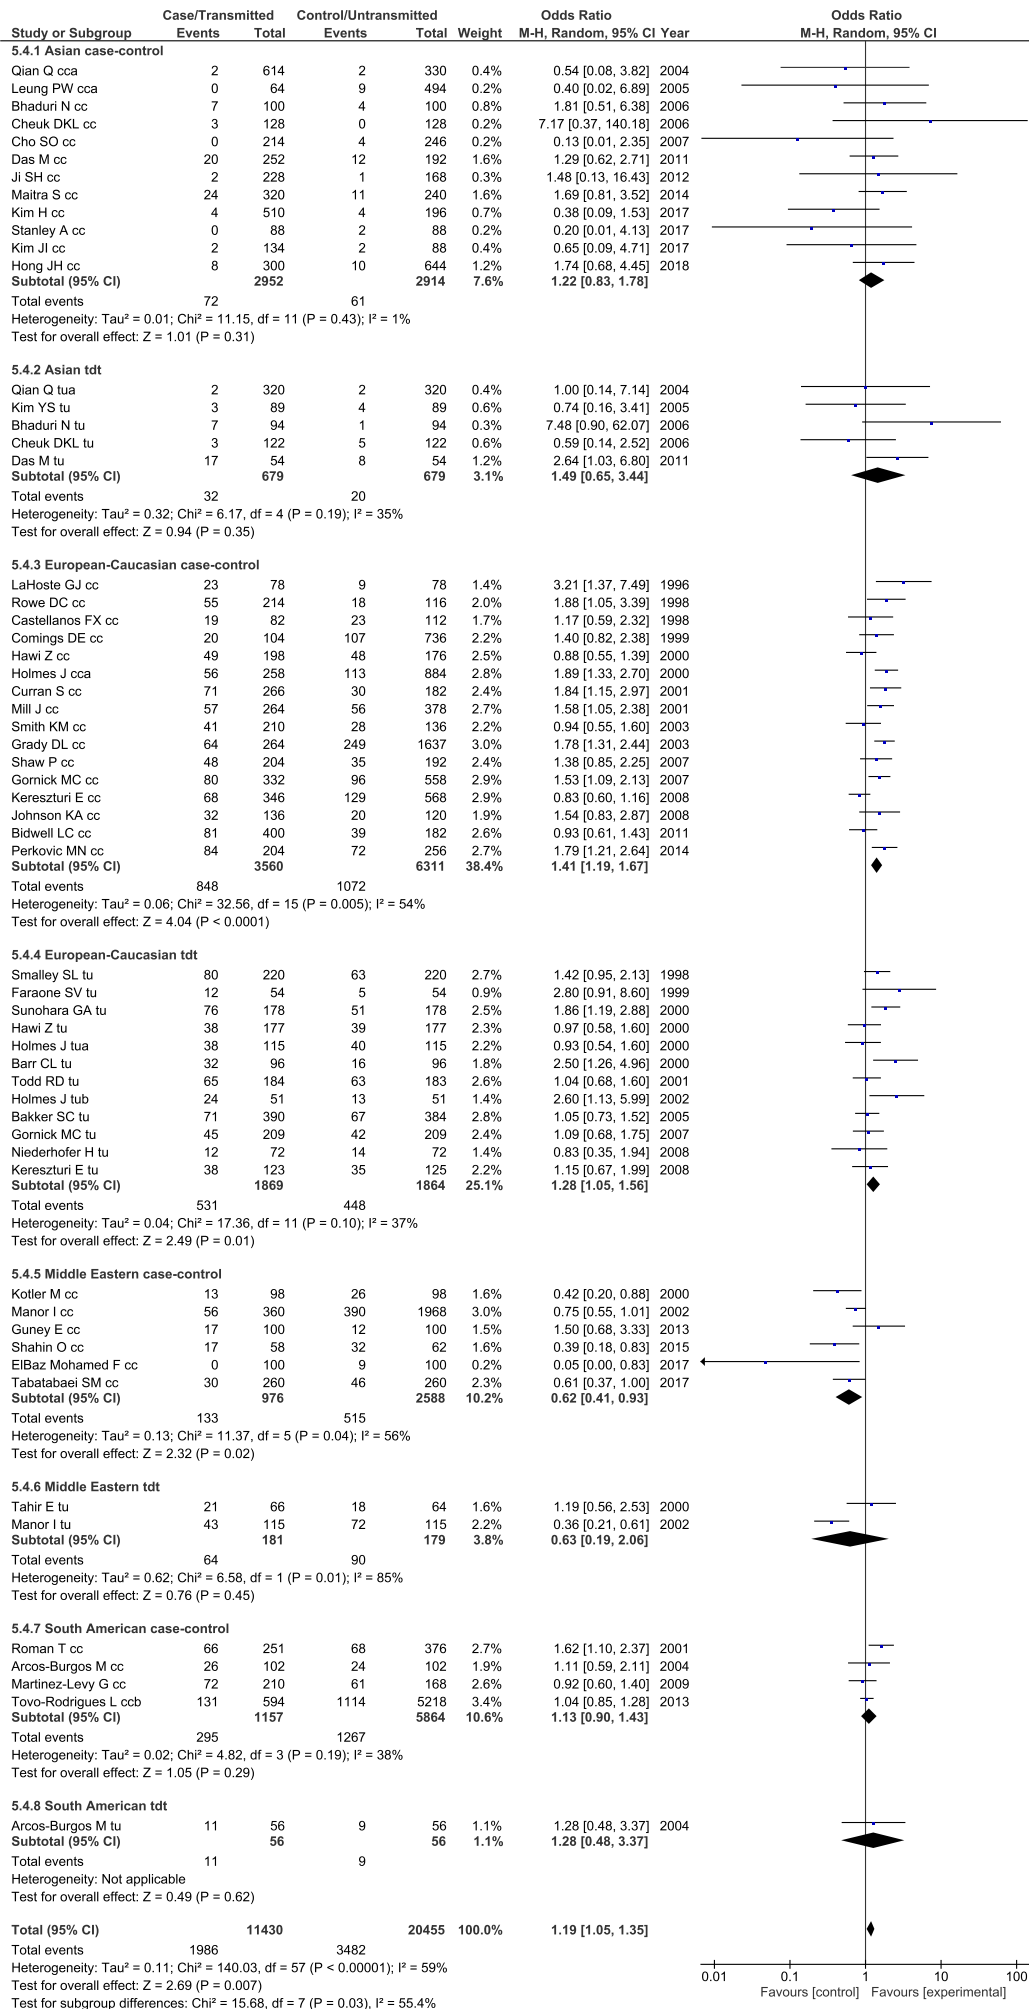

0.01 0.1 1 10 100  
Favours [control] Favours [experimental]
